# Supplementary material for: The parietal cortex has a causal role in ambiguity computations in humans
Source: PubMed Central journal article supplement (PMC10824459; doi:10.1371/journal.pbio.3002452), 2024-01-10
Supplement: pbio.3002452.s004.pdf [file pbio.3002452.s004.pdf]

# Supplementary Table 1

## fMRI behavioral Models

### MODEL: Logit

|             | Lower95   | Median    | Upper95   | Mean      | SD     | Mode      | psrf  |
|-------------|-----------|-----------|-----------|-----------|--------|-----------|-------|
| beta0       | -3,531    | -3,074    | -2,583    | -3,074    | 0,244  | -3,055    | 1,074 |
| beta1 PV    | 5,789     | 6,775     | 7,764     | 6,790     | 0,508  | 6,745     | 1,077 |
| beta2 Rw    | 0,819     | 1,282     | 1,785     | 1,289     | 0,248  | 1,269     | 1,014 |
| beta3 PV*AM | -4,637    | -3,929    | -3,126    | -3,908    | 0,399  | -3,947    | 1,081 |
| beta4 Rw*AM | -0,396    | -0,168    | 0,074     | -0,166    | 0,123  | -0,167    | 1,018 |
| beta5 AM    | 1,445     | 1,855     | 2,231     | 1,844     | 0,204  | 1,900     | 1,080 |
| deviance    | 1.408,430 | 1.437,135 | 1.470,610 | 1.437,823 | 15,727 | 1.437,550 | 1,009 |

### MODEL: null (Prospect theory)

|          | Lower95   | Median    | Upper95   | Mean      | SD     | Mode      | psrf  |
|----------|-----------|-----------|-----------|-----------|--------|-----------|-------|
| alpha    | 1,102     | 1,602     | 2,056     | 1,610     | 0,245  | 1,614     | 1,012 |
| gamma    | 1,802     | 2,522     | 3,374     | 2,549     | 0,408  | 2,485     | 1,006 |
| beta_0   | -0,043    | 0,088     | 0,215     | 0,086     | 0,068  | 0,085     | 1,003 |
| beat_1   | 6,454     | 10,426    | 15,155    | 10,652    | 2,231  | 10,014    | 1,019 |
| deviance | 1.599,340 | 1.626,300 | 1.657,740 | 1.626,962 | 14,966 | 1.625,050 | 1,004 |

### MODEL: tau\_i

|          | Lower95   | Median    | Upper95   | Mean      | SD     | Mode      | psrf  |
|----------|-----------|-----------|-----------|-----------|--------|-----------|-------|
| tau_i    | 1,250     | 1,819     | 2,478     | 1,848     | 0,322  | 1,794     | 1,002 |
| alpha    | 0,699     | 1,115     | 1,678     | 1,133     | 0,252  | 1,089     | 1,002 |
| gamma    | 2,552     | 3,890     | 5,475     | 3,900     | 0,729  | 3,923     | 1,010 |
| beta_0   | 0,012     | 0,150     | 0,282     | 0,148     | 0,068  | 0,145     | 1,006 |
| beta_1   | 11,750    | 22,486    | 42,344    | 24,469    | 8,264  | 20,948    | 1,011 |
| deviance | 1.330,300 | 1.363,900 | 1.396,900 | 1.364,200 | 17,092 | 1.363,400 | 1,001 |

### MODEL: tau\_i + tau\_b

|          | Lower95   | Median    | Upper95   | Mean      | SD     | Mode      | psrf  |
|----------|-----------|-----------|-----------|-----------|--------|-----------|-------|
| tau_b    | 0,468     | 0,507     | 0,547     | 0,507     | 0,021  | 0,507     | 1,001 |
| tau_i    | 0,989     | 1,451     | 1,971     | 1,474     | 0,259  | 1,403     | 1,002 |
| alpha    | 0,608     | 1,097     | 1,791     | 1,151     | 0,313  | 1,015     | 1,010 |
| gamma    | 2,113     | 3,661     | 5,552     | 3,765     | 0,883  | 3,475     | 1,007 |
| beta_0   | -179,972  | 2,547     | 207,589   | 2,651     | 99,241 | 7,229     | 1,000 |
| beat_1   | 10,422    | 20,533    | 55,917    | 24,283    | 12,639 | 18,495    | 1,021 |
| deviance | 1.322,880 | 1.358,205 | 1.394,250 | 1.358,304 | 18,387 | 1.358,770 | 1,000 |

### MODEL: tau\_i + Wr

|          | Lower95   | Median    | Upper95   | Mean      | SD     | Mode      | psrf  |
|----------|-----------|-----------|-----------|-----------|--------|-----------|-------|
| tau_i    | 1,247     | 1,853     | 2,614     | 1,893     | 0,348  | 1,791     | 1,006 |
| alpha    | 0,800     | 0,957     | 1,162     | 0,970     | 0,108  | 0,889     | 1,001 |
| Er       | -0,122    | 0,488     | 1,287     | 0,531     | 0,362  | 0,445     | 1,011 |
| Wr       | 0,165     | 2,539     | 4,254     | 2,425     | 1,140  | 2,850     | 1,001 |
| beta_o   | 0,014     | 0,163     | 0,313     | 0,163     | 0,076  | 0,174     | 1,016 |
| beta_1   | 13,031    | 20,098    | 29,514    | 20,816    | 4,691  | 19,407    | 1,007 |
| deviance | 1.325,420 | 1.357,860 | 1.392,880 | 1.358,047 | 17,281 | 1.357,207 | 1,002 |
