# Supplementary material for: The parietal cortex has a causal role in ambiguity computations in humans
Source: PubMed Central journal article supplement (PMC10824459; doi:10.1371/journal.pbio.3002452), 2024-01-10
Supplement: pbio.3002452.s005.pdf [file pbio.3002452.s005.pdf]

## Supplementary Table 2

### fMRI Decision Model 1

#### Regressor: Rw

| Cluster | Voxels | P        | -log10(P) | Z-MAX | Z-MAX X | Z-MAX Y | Z-MAX Z | Z-COG X | Z-COG Y | Z-COG Z | COPE- | COPE- | COPE- | COPE- | COPE- |
|---------|--------|----------|-----------|-------|---------|---------|---------|---------|---------|---------|-------|-------|-------|-------|-------|
| 19      | 2473   | 9.90E-25 | 24        | 5     | 2       | 20      | 50      | -3.6    | 15      | 50.2    | 106   | -32   | -4    | 70    | 37.3  |
| 18      | 2225   | 5.45E-23 | 22.3      | 4.38  | -44     | -30     | 36      | -37.8   | -43.6   | 50.4    | 138   | -48   | -40   | 60    | 46.6  |
| 17      | 1012   | 3.04E-13 | 12.5      | 4.25  | 28      | -54     | -24     | 24.4    | -65.2   | -21.5   | 69.3  | 28    | -76   | -18   | 30.7  |
| 16      | 961    | 9.12E-13 | 12        | 5.28  | 16      | 18      | 10      | 14.1    | 6.95    | 5.24    | 53.7  | 8     | 6     | 4     | 23.2  |
| 15      | 949    | 1.19E-12 | 11.9      | 5.22  | -12     | 6       | 0       | -13.8   | 10.2    | 1.54    | 63.2  | -6    | 2     | 10    | 26.2  |
| 14      | 358    | 3.40E-06 | 5.47      | 4.29  | 50      | -70     | 2       | 51.1    | -65.7   | -2.31   | 49.2  | 52    | -66   | 0     | 28.9  |
| 13      | 326    | 9.12E-06 | 5.04      | 4.03  | -54     | 14      | 0       | -51.7   | 9.56    | 22.4    | 67    | -54   | 18    | -4    | 35    |
| 12      | 315    | 1.29E-05 | 4.89      | 4.31  | -42     | 54      | 12      | -40.2   | 50.1    | 10      | 55.2  | -42   | 54    | 12    | 33.6  |
| 11      | 304    | 1.82E-05 | 4.74      | 4.29  | 30      | -38     | 44      | 38.6    | -41.1   | 52      | 76.2  | 48    | -38   | 62    | 41.4  |
| 10      | 299    | 2.15E-05 | 4.67      | 4.23  | 36      | -2      | 52      | 32.9    | -3.98   | 56.6    | 87.5  | 32    | 4     | 66    | 40.2  |
| 9       | 211    | 4.25E-04 | 3.37      | 4.15  | -14     | -18     | 4       | -10.8   | -18.8   | 7.3     | 31    | -2    | -12   | 10    | 15.8  |
| 8       | 207    | 4.92E-04 | 3.31      | 4.36  | 60      | 14      | 2       | 54.5    | 11      | 14.1    | 53.1  | 60    | 14    | 2     | 29.6  |
| 7       | 195    | 7.63E-04 | 3.12      | 3.97  | 12      | -70     | 56      | 16.6    | -68.9   | 52.9    | 82.2  | 12    | -70   | 62    | 49.9  |
| 6       | 179    | 1.39E-03 | 2.86      | 4.37  | -32     | -68     | -24     | -32.9   | -58.6   | -26.3   | 36.8  | -32   | -68   | -22   | 23.5  |
| 5       | 168    | 2.13E-03 | 2.67      | 4.17  | 28      | -76     | -50     | 24.5    | -74.2   | -49.4   | 30.8  | 30    | -74   | -50   | 23.8  |
| 4       | 149    | 4.52E-03 | 2.35      | 4.18  | 42      | 48      | 16      | 40.6    | 47.4    | 18.9    | 38.9  | 42    | 52    | 12    | 29.7  |
| 3       | 146    | 5.10E-03 | 2.29      | 3.91  | 20      | -100    | 6       | 16.7    | -101    | 3.96    | 57.5  | 12    | -102  | 0     | 40.2  |
| 2       | 127    | 1.12E-02 | 1.95      | 4.03  | 2       | -58     | -24     | 2.84    | -60.8   | -29     | 19.7  | 4     | -66   | -38   | 15.9  |
| 1       | 105    | 2.94E-02 | 1.53      | 4.35  | -30     | 22      | 2       | -30     | 21.2    | 4.32    | 31.8  | -32   | 20    | 8     | 21.5  |

#### Regressor: Pa

| Cluster | Voxels | P        | -log10(P) | Z-MAX | Z-MAX X | Z-MAX Y | Z-MAX Z | Z-COG X | Z-COG Y | Z-COG Z | COPE- | COPE- | COPE- | COPE- | COPE- |
|---------|--------|----------|-----------|-------|---------|---------|---------|---------|---------|---------|-------|-------|-------|-------|-------|
| 5       | 6009   | 0.00E+00 | 47.5      | 5.37  | -16     | -64     | 50      | 1.35    | -59.5   | 53.1    | 245   | 10    | -68   | 64    | 101   |
| 4       | 1157   | 1.81E-15 | 14.7      | 5.07  | 12      | -92     | -22     | 23.1    | -80.7   | -22.8   | 257   | 20    | -90   | -22   | 95.4  |
| 3       | 381    | 6.56E-07 | 6.18      | 5.03  | 36      | -48     | -54     | 36      | -45     | -50.1   | 81.7  | 36    | -48   | -54   | 49.9  |
| 2       | 159    | 1.85E-03 | 2.73      | 4.18  | -28     | -64     | -28     | -28.9   | -64.3   | -27.2   | 64.8  | -26   | -74   | -22   | 47.9  |
| 1       | 132    | 5.97E-03 | 2.22      | 4.51  | 28      | -4      | 52      | 27.3    | -4.6    | 52.5    | 79.4  | 30    | -6    | 58    | 56.1  |

#### Regressor: Pall[A > nA]

| Cluster | Voxels | P        | -log10(P) | Z-MAX | Z-MAX X | Z-MAX Y | Z-MAX Z | Z-COG X | Z-COG Y | Z-COG Z | COPE- | COPE- | COPE- | COPE- | COPE- |
|---------|--------|----------|-----------|-------|---------|---------|---------|---------|---------|---------|-------|-------|-------|-------|-------|
| 1       | 212    | 2.18E-04 | 3.66      | 3.88  | 30      | -44     | 40      | 38.3    | -42.4   | 44      | 100   | 48    | -44   | 60    | 50.9  |

### fMRI Decision Model 2

#### Regressor: Pall(tau\_i=0)

| Cluster | Voxels | P        | -log10(P) | Z-MAX | Z-MAX X | Z-MAX Y | Z-MAX Z | Z-COG X | Z-COG Y | Z-COG Z | COPE- | COPE- | COPE- | COPE- | COPE- |
|---------|--------|----------|-----------|-------|---------|---------|---------|---------|---------|---------|-------|-------|-------|-------|-------|
| 2       | 875    | 3.02E-13 | 12.5      | 4.19  | 14      | -66     | 58      | -9.16   | -62.8   | 55.9    | 125   | -38   | -56   | 58    | 63.9  |
| 1       | 188    | 3.72E-04 | 3.43      | 4.19  | 32      | -44     | 42      | 36      | -43.4   | 43.6    | 91.7  | 44    | -48   | 60    | 44    |

#### Regressor: Pall(tau\_i=1)

| Cluster | Voxels | P        | -log10(P) | Z-MAX | Z-MAX X | Z-MAX Y | Z-MAX Z | Z-COG X | Z-COG Y | Z-COG Z | COPE- | COPE- | COPE- | COPE- | COPE- |
|---------|--------|----------|-----------|-------|---------|---------|---------|---------|---------|---------|-------|-------|-------|-------|-------|
| 10      | 4389   | 1.69E-38 | 37.8      | 5.66  | -54     | -20     | 42      | -27.9   | -11.7   | 52.7    | 123   | -46   | -40   | 60    | 41    |
| 9       | 2880   | 7.49E-29 | 28.1      | 5.37  | 26      | -48     | -20     | 10.2    | -74.1   | -4.37   | 94.7  | 2     | -88   | 0     | 38.8  |
| 8       | 697    | 1.17E-10 | 9.93      | 5.25  | -16     | -70     | 52      | -18.1   | -67.7   | 49      | 94.8  | -16   | -74   | 56    | 45.4  |
| 7       | 537    | 8.17E-09 | 8.09      | 5.87  | -44     | -66     | -18     | -43.5   | -61.2   | -18.4   | 74.6  | -46   | -70   | -20   | 39.1  |
| 6       | 427    | 1.79E-07 | 6.75      | 4.9   | -14     | 14      | 0       | -18.1   | 10.7    | 0.875   | 25.9  | -16   | 12    | 0     | 18.2  |
| 5       | 374    | 9.54E-07 | 6.02      | 4.68  | 14      | 16      | 2       | 18      | 11.9    | 2.72    | 24.9  | 20    | 10    | -8    | 18    |
| 4       | 248    | 6.61E-05 | 4.18      | 4.14  | -40     | 36      | 26      | -38.7   | 37.1    | 23      | 41.1  | -42   | 40    | 14    | 28    |
| 3       | 209    | 2.79E-04 | 3.55      | 4.61  | 52      | -76     | 4       | 48.6    | -79.6   | -0.197  | 49.8  | 42    | -88   | -10   | 32    |
| 2       | 122    | 1.01E-02 | 2         | 4.82  | -44     | -2      | 6       | -43     | -0.926  | 8.51    | 33.7  | -44   | -2    | 8     | 22.1  |
| 1       | 89     | 4.80E-02 | 1.32      | 4.14  | 32      | 42      | 22      | 33.7    | 43.6    | 23.5    | 33.3  | 32    | 42    | 26    | 26.1  |

### fMRI Feedback Model

#### Regressor: Win

| Cluster | Voxels | P        | -log10(P) | Z-MAX | Z-MAX X | Z-MAX Y | Z-MAX Z | Z-COG X | Z-COG Y | Z-COG Z | COPE- | COPE- | COPE- | COPE- | COPE- |
|---------|--------|----------|-----------|-------|---------|---------|---------|---------|---------|---------|-------|-------|-------|-------|-------|
| 10      | 4265   | 1.25E-37 | 36.9      | 5.5   | -4      | 16      | 42      | -24.5   | -9.38   | 52.9    | 109   | -46   | -40   | 60    | 39.6  |
| 9       | 3327   | 9.47E-32 | 31        | 5.18  | 26      | -46     | -20     | 7.77    | -76     | -1.6    | 94.5  | 2     | -88   | 0     | 37.3  |
| 8       | 482    | 5.96E-08 | 7.22      | 4.69  | 16      | 16      | 0       | 21.3    | 13.3    | 3.36    | 31.1  | 34    | 20    | 8     | 19.4  |
| 7       | 422    | 2.38E-07 | 6.62      | 5.05  | -20     | 12      | 0       | -17.6   | 12.1    | 1.49    | 28.8  | -18   | 12    | 0     | 19.6  |
| 6       | 413    | 2.98E-07 | 6.53      | 5.62  | -44     | -66     | -18     | -43     | -61.4   | -16.4   | 67.3  | -46   | -70   | -20   | 38.2  |
| 5       | 232    | 1.23E-04 | 3.91      | 4.1   | -38     | 36      | 18      | -38.6   | 37      | 21.9    | 42.4  | -42   | 40    | 14    | 28.9  |
| 4       | 159    | 2.09E-03 | 2.68      | 4.5   | 52      | -76     | 4       | 51.7    | -75     | 3.9     | 43.9  | 48    | -80   | 8     | 29.6  |
| 3       | 98     | 3.15E-02 | 1.5       | 4.58  | -44     | -2      | 6       | -42.2   | -1.39   | 9.29    | 33.2  | -44   | -2    | 8     | 22.2  |
| 2       | 93     | 4.01E-02 | 1.4       | 4.97  | -8      | -22     | 8       | -11.1   | -21.3   | 7.05    | 23.7  | -8    | -22   | 8     | 16.5  |
| 1       | 90     | 4.64E-02 | 1.33      | 4.45  | -16     | -70     | 52      | -16.7   | -69.7   | 50.4    | 68.1  | -16   | -72   | 54    | 44    |

#### Regressor: PE\_Pall[A]

| Cluster | Voxels | P        | -log10(P) | Z-MAX | Z-MAX X | Z-MAX Y | Z-MAX Z | Z-COG X | Z-COG Y | Z-COG Z | COPE- | COPE- | COPE- | COPE- | COPE- |
|---------|--------|----------|-----------|-------|---------|---------|---------|---------|---------|---------|-------|-------|-------|-------|-------|
| 1       | 337    | 2.38E-06 | 5.62      | 4.3   | -8      | 18      | 44      | -3.15   | 18.6    | 43.6    | 21.9  | 0     | 22    | 46    |       |

#### Regressor: PE\_Pall[nA]

| Cluster | Voxels | P        | -log10(P) | Z-MAX | Z-MAX X | Z-MAX Y | Z-MAX Z | Z-COG X | Z-COG Y | Z-COG Z | COPE- | COPE- | COPE- | COPE- | COPE- |
|---------|--------|----------|-----------|-------|---------|---------|---------|---------|---------|---------|-------|-------|-------|-------|-------|
| 18      | 2597   | 1.20E-25 | 24.9      | 4.84  | 2       | 20      | 50      | -4.71   | 14.4    | 49.9    | 99.6  | -32   | -4    | 70    | 34.8  |
| 17      | 1960   | 4.12E-21 | 20.4      | 4.38  | -54     | -22     | 40      | -40.6   | -38.9   | 49.5    | 126   | -48   | -40   | 60    | 42.6  |
| 16      | 1078   | 6.89E-14 | 13.2      | 5.35  | -16     | 14      | -2      | -15.1   | 11.5    | 1.89    | 61.2  | -6    | 2     | 10    | 25.4  |
| 15      | 967    | 7.40E-13 | 12.1      | 5.46  | 16      | 18      | 10      | 14.2    | 8.16    | 5.07    | 50.3  | 8     | 6     | 4     | 22.7  |
| 14      | 465    | 1.19E-07 | 6.92      | 3.99  | 26      | -76     | -16     | 15.8    | -77.5   | -12     | 67.4  | 2     | -88   | -4    | 40.4  |
| 13      | 327    | 8.52E-06 | 5.07      | 4.11  | 26      | -54     | -24     | 29.6    | -51.9   | -26.7   | 31.7  | 32    | -52   | -20   | 18.4  |

|    |     |          |      |      |     |      |     |       |       |       |      |     |      |     |      |
|----|-----|----------|------|------|-----|------|-----|-------|-------|-------|------|-----|------|-----|------|
| 12 | 266 | 6.13E-05 | 4.21 | 3.99 | -54 | 6    | 14  | -51.5 | 9.51  | 21.5  | 64.3 | -54 | 18   | -4  | 32.6 |
| 11 | 262 | 7.00E-05 | 4.15 | 4.04 | 50  | -68  | 0   | 51    | -66.2 | -2.78 | 44.3 | 52  | -66  | 0   | 27.6 |
| 10 | 256 | 8.58E-05 | 4.07 | 4.25 | -42 | 54   | 12  | -40.4 | 49.7  | 10.2  | 53   | -42 | 54   | 12  | 31.6 |
| 9  | 253 | 9.50E-05 | 4.02 | 4.11 | 36  | -4   | 52  | 33.4  | -4.22 | 56.5  | 75.1 | 32  | 0    | 66  | 36.2 |
| 8  | 224 | 2.60E-04 | 3.58 | 4.12 | -14 | -22  | 8   | -10.2 | -19.2 | 6.04  | 31.1 | -2  | -12  | 10  | 15.4 |
| 7  | 217 | 3.34E-04 | 3.48 | 4.29 | 58  | 14   | 4   | 54.6  | 10.5  | 14.8  | 48.7 | 60  | 14   | 2   | 27.9 |
| 6  | 134 | 8.21E-03 | 2.09 | 4.2  | 30  | -38  | 42  | 35.9  | -41.7 | 52.8  | 58.6 | 44  | -40  | 62  | 33.5 |
| 5  | 133 | 8.57E-03 | 2.07 | 4.04 | -32 | -66  | -24 | -32.3 | -57   | -25.2 | 34.8 | -34 | -68  | -22 | 22.6 |
| 4  | 116 | 1.78E-02 | 1.75 | 3.96 | 2   | -58  | -26 | 3.12  | -61   | -29.2 | 20.5 | 4   | -68  | -38 | 15.7 |
| 3  | 110 | 2.31E-02 | 1.64 | 4.07 | 30  | -76  | -50 | 21.4  | -75.5 | -49.4 | 28.9 | 30  | -76  | -50 | 23.3 |
| 2  | 107 | 2.64E-02 | 1.58 | 3.77 | 10  | -104 | 4   | 16    | -101  | 2.83  | 56.9 | 12  | -102 | 0   | 39.5 |
| 1  | 95  | 4.56E-02 | 1.34 | 4.09 | 40  | 50   | 14  | 41.8  | 48.3  | 16.5  | 37.7 | 42  | 52   | 12  | 28.5 |

## fMRI Feedback PPI seed IPS

### Regressor: PPI [A > nA]

|    |      |          |      |      |     |     |     |       |       |       |      |     |     |     |      |
|----|------|----------|------|------|-----|-----|-----|-------|-------|-------|------|-----|-----|-----|------|
| 10 | 4265 | 1.25E-37 | 36.9 | 5.5  | -4  | 16  | 42  | -24.5 | -9.38 | 52.9  | 109  | -46 | -40 | 60  | 39.6 |
| 9  | 3327 | 9.47E-32 | 31   | 5.18 | 26  | -46 | -20 | 7.77  | -76   | -1.6  | 94.5 | 2   | -88 | 0   | 37.3 |
| 8  | 482  | 5.96E-08 | 7.22 | 4.69 | 16  | 16  | 0   | 21.3  | 13.3  | 3.36  | 31.1 | 34  | 20  | 8   | 19.4 |
| 7  | 422  | 2.38E-07 | 6.62 | 5.05 | -20 | 12  | 0   | -17.6 | 12.1  | 1.49  | 28.8 | -18 | 12  | 0   | 19.6 |
| 6  | 413  | 2.98E-07 | 6.53 | 5.62 | -44 | -66 | -18 | -43   | -61.4 | -16.4 | 67.3 | -46 | -70 | -20 | 38.2 |
| 5  | 232  | 1.23E-04 | 3.91 | 4.1  | -38 | 36  | 18  | -38.6 | 37    | 21.9  | 42.4 | -42 | 40  | 14  | 28.9 |
| 4  | 159  | 2.09E-03 | 2.68 | 4.5  | 52  | -76 | 4   | 51.7  | -75   | 3.9   | 43.9 | 48  | -80 | 8   | 29.6 |
| 3  | 98   | 3.15E-02 | 1.5  | 4.58 | -44 | -2  | 6   | -42.2 | -1.39 | 9.29  | 33.2 | -44 | -2  | 8   | 22.2 |
| 2  | 93   | 4.01E-02 | 1.4  | 4.97 | -8  | -22 | 8   | -11.1 | -21.3 | 7.05  | 23.7 | -8  | -22 | 8   | 16.5 |
| 1  | 90   | 4.64E-02 | 1.33 | 4.45 | -16 | -70 | 52  | -16.7 | -69.7 | 50.4  | 68.1 | -16 | -72 | 54  | 44   |
