# Supplementary material for: The parietal cortex has a causal role in ambiguity computations in humans
Source: PubMed Central journal article supplement (PMC10824459; doi:10.1371/journal.pbio.3002452), 2024-01-10
Supplement: pbio.3002452.s006.pdf [file pbio.3002452.s006.pdf]

# Supplementary Table 3

## TMS behavioral Models

### MODEL: Logit

|                  | Lower95   | Median    | Upper95   | Mean      | SD     | Mode      | psrf  | pMCMC     |
|------------------|-----------|-----------|-----------|-----------|--------|-----------|-------|-----------|
| beta0            | -6,992    | -5,433    | -3,686    | -5,433    | 0,855  | -5,524    | 1,036 | 0,000 *** |
| beta1 PV         | 5,898     | 7,817     | 9,776     | 7,834     | 0,991  | 7,843     | 1,026 | 0,000 *** |
| beta2 Rw         | 1,602     | 3,499     | 5,441     | 3,512     | 0,984  | 3,449     | 1,016 | 0,000 *** |
| beta3 PV*AM      | -8,372    | -5,347    | -2,419    | -5,335    | 1,536  | -5,472    | 1,034 | 0,000 *** |
| beta4 Rw*AM      | -2,842    | -0,142    | 2,908     | -0,073    | 1,520  | -0,189    | 1,023 | 0,468     |
| beta5 AM         | -0,799    | 2,074     | 4,580     | 2,008     | 1,424  | 2,102     | 1,036 | 0,092     |
| beta0t TMS       | -1,937    | -0,345    | 1,227     | -0,391    | 0,869  | -0,285    | 1,086 | 0,351     |
| beta1t PV*TMS    | -0,906    | 1,000     | 2,891     | 1,011     | 0,991  | 0,938     | 1,077 | 0,155     |
| beta2t Rw*TMS    | -2,149    | -0,586    | 1,040     | -0,561    | 0,855  | -0,787    | 1,060 | 0,269     |
| beta3t PV*AM*TMS | -7,412    | -3,238    | -0,137    | -3,335    | 1,884  | -2,958    | 1,061 | 0,027 *   |
| beta4t Rw*AM*TMS | -3,105    | 0,406     | 4,203     | 0,325     | 1,976  | 0,157     | 1,035 | 0,434     |
| beta5t AM*TMS    | -1,691    | 1,794     | 5,021     | 1,933     | 1,848  | 1,349     | 1,056 | 0,150     |
| deviance         | 2.783,320 | 2.829,205 | 2.878,410 | 2.830,358 | 24,445 | 2.824,596 | 1,000 |           |

### MODEL: tau\_i

|              | Lower95   | Median    | Upper95   | Mean      | SD     | Mode      | psrf  | pMCMC for TMS effects |
|--------------|-----------|-----------|-----------|-----------|--------|-----------|-------|-----------------------|
| tau_i        | 0,342     | 0,718     | 1,163     | 0,737     | 0,213  | 0,697     | 1,003 |                       |
| tau_i * TMS  | 0,070     | 0,484     | 0,885     | 0,497     | 0,206  | 0,481     | 1,003 | 0,008 **              |
| alpha        | 0,109     | 3,476     | 12,624    | 4,630     | 3,930  | 1,733     | 1,001 |                       |
| alpha*TMS    | -4,434    | -0,717    | 3,051     | -0,706    | 1,942  | -0,473    | 1,040 | 0,688                 |
| gamma        | 1,948     | 2,947     | 4,007     | 2,972     | 0,535  | 2,871     | 1,002 |                       |
| gamma * TMS  | -0,233    | 0,043     | 0,495     | 0,061     | 0,167  | 0,032     | 1,005 | 0,660                 |
| beta_0       | -0,213    | -0,036    | 0,124     | -0,037    | 0,086  | -0,045    | 1,000 |                       |
| beta_0* TMS  | -0,249    | -0,044    | 0,154     | -0,043    | 0,105  | -0,055    | 1,000 | 0,670                 |
| beta_1       | 3,871     | 8,255     | 12,741    | 8,274     | 2,284  | 8,203     | 1,002 |                       |
| beta_1 * TMS | -0,318    | 2,728     | 5,461     | 2,745     | 1,430  | 2,696     | 1,007 | 0,054                 |
| deviance     | 2.866,900 | 2.902,355 | 2.935,600 | 2.902,180 | 17,902 | 2.902,536 | 1,003 |                       |

### MODEL: tau\_i + tau\_b

|              | Lower95   | Median    | Upper95   | Mean      | SD     | Mode      | psrf  | pMCMC for TMS effects |
|--------------|-----------|-----------|-----------|-----------|--------|-----------|-------|-----------------------|
| tau_i        | 0,249     | 0,583     | 0,979     | 0,595     | 0,186  | 0,542     | 1,001 |                       |
| tau_i * TMS  | 0,141     | 0,491     | 0,864     | 0,507     | 0,187  | 0,468     | 1,000 | 0,001 ***             |
| tau_b        | 0,292     | 0,400     | 0,503     | 0,400     | 0,053  | 0,405     | 1,003 |                       |
| tau_b* TMS   | -0,020    | 0,069     | 0,157     | 0,071     | 0,045  | 0,067     | 1,006 | 0,105                 |
| alpha        | 0,816     | 1,002     | 1,193     | 1,000     | 0,117  | 1,097     | 1,000 |                       |
| alpha*TMS    | 1,932     | 2,974     | 4,131     | 3,008     | 0,563  | 2,869     | 1,001 | 0,945                 |
| gamma        | -0,497    | 2,461     | 5,016     | 2,527     | 1,375  | 2,442     | 1,006 |                       |
| gamma * TMS  | -0,381    | -0,127    | 0,126     | -0,125    | 0,128  | -0,126    | 1,001 | 0,720                 |
| beta_0       | -0,347    | 0,046     | 0,464     | 0,054     | 0,201  | 0,035     | 1,007 |                       |
| beta_0* TMS  | -1,738    | -0,085    | 1,876     | -0,036    | 1,001  | -0,011    | 1,005 | 0,314                 |
| beta_1       | 3,563     | 8,024     | 12,672    | 8,069     | 2,318  | 7,716     | 1,002 |                       |
| beta_1 * TMS | 2.855,570 | 2.891,910 | 2.929,850 | 2.892,347 | 19,509 | 2.891,273 | 1,002 | 0,063                 |
| deviance     | -0,113    | 0,093     | 0,302     | 0,093     | 0,106  | 0,081     | 1,001 |                       |

### MODEL: tau\_i + tau\_b

|              | Lower95   | Median    | Upper95   | Mean      | SD     | Mode      | psrf  | pMCMC for TMS effects |
|--------------|-----------|-----------|-----------|-----------|--------|-----------|-------|-----------------------|
| tau_i        | 0,347     | 0,731     | 1,145     | 0,751     | 0,208  | 0,706     | 1,021 |                       |
| tau_i * TMS  | 0,017     | 0,510     | 1,033     | 0,516     | 0,256  | 0,510     | 1,008 | 0,009 **              |
| alpha        | 0,108     | 1,023     | 1,898     | 1,031     | 0,542  | 1,118     | 1,000 |                       |
| alpha*TMS    | -1,816    | -0,041    | 1,841     | -0,009    | 1,045  | -0,128    | 1,041 | 0,976                 |
| gamma        | 1,659     | 2,677     | 3,743     | 2,703     | 0,528  | 2,611     | 1,102 |                       |
| gamma * TMS  | -0,469    | -0,013    | 0,430     | -0,005    | 0,222  | -0,027    | 1,032 | 1,000                 |
| beta_0       | -0,203    | -0,020    | 0,156     | -0,019    | 0,092  | -0,022    | 1,006 |                       |
| beta_0* TMS  | -0,291    | -0,054    | 0,148     | -0,057    | 0,112  | -0,061    | 1,006 | 0,597                 |
| beta_1       | 5,404     | 9,172     | 13,568    | 9,198     | 2,064  | 9,343     | 1,040 |                       |
| beta_1 * TMS | 0,297     | 2,463     | 4,933     | 2,483     | 1,169  | 2,423     | 1,014 | 0,037 *               |
| Wr           | -0,483    | -0,164    | 0,162     | -0,166    | 0,161  | -0,163    | 1,003 |                       |
| Wr*TMS       | -0,398    | -0,029    | 0,234     | -0,039    | 0,160  | -0,003    | 1,012 | 0,846                 |
| deviance     | 2.776,530 | 2.813,050 | 2.854,830 | 2.814,659 | 20,656 | 2.810,781 | 1,041 |                       |
